# Supplementary material
Source: Springer Nature journal article supplement (https://www.springermedizin.de/resource/supplementary/13054_2010_8778_MOESM3_ESM.pdf/9732544)

**A**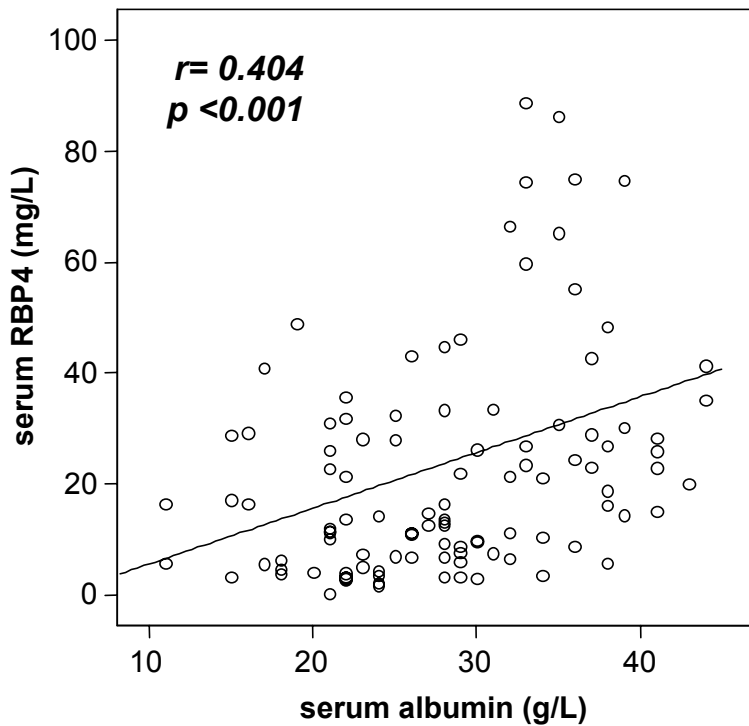**B**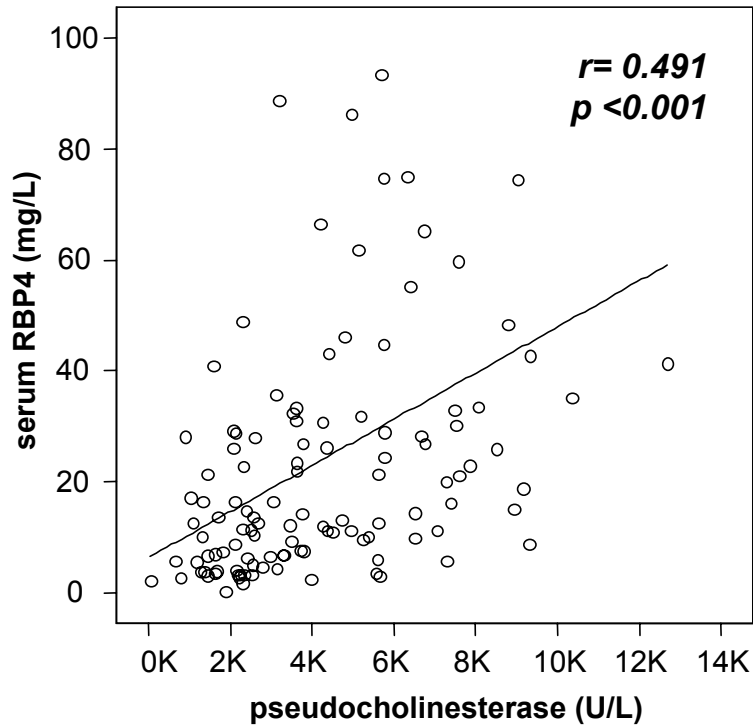**C**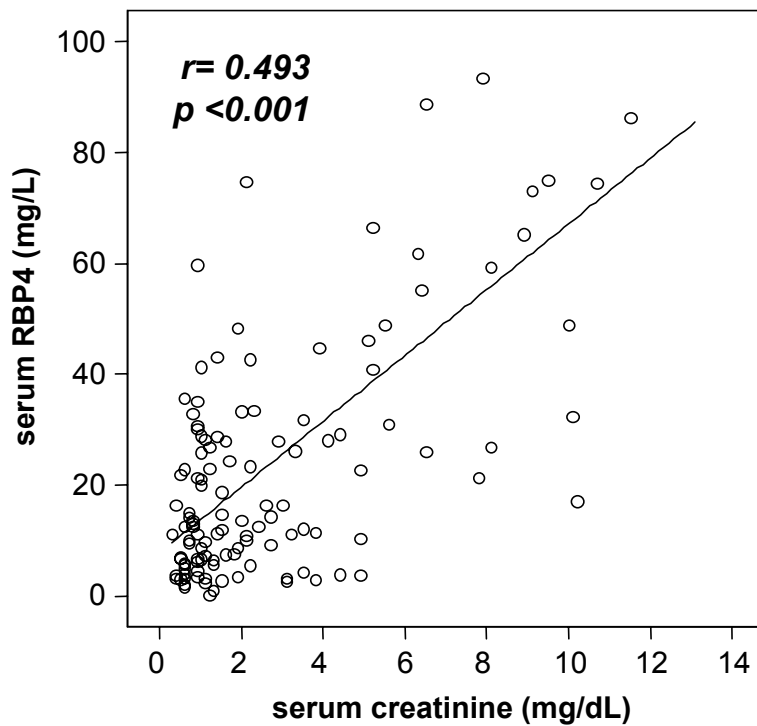

Supplement: MOESM3 [file 9732544]
